# Supplementary material for: Latitudinal Clines of the Human Vitamin D Receptor and Skin Color Genes
Source: PubMed Central journal article supplement (PMC4856077; doi:10.1534/g3.115.026773), 2016-02-26
Supplement: supp_g3.115.026773_FigureS1.pdf [file supp_g3.115.026773_FigureS1.pdf]

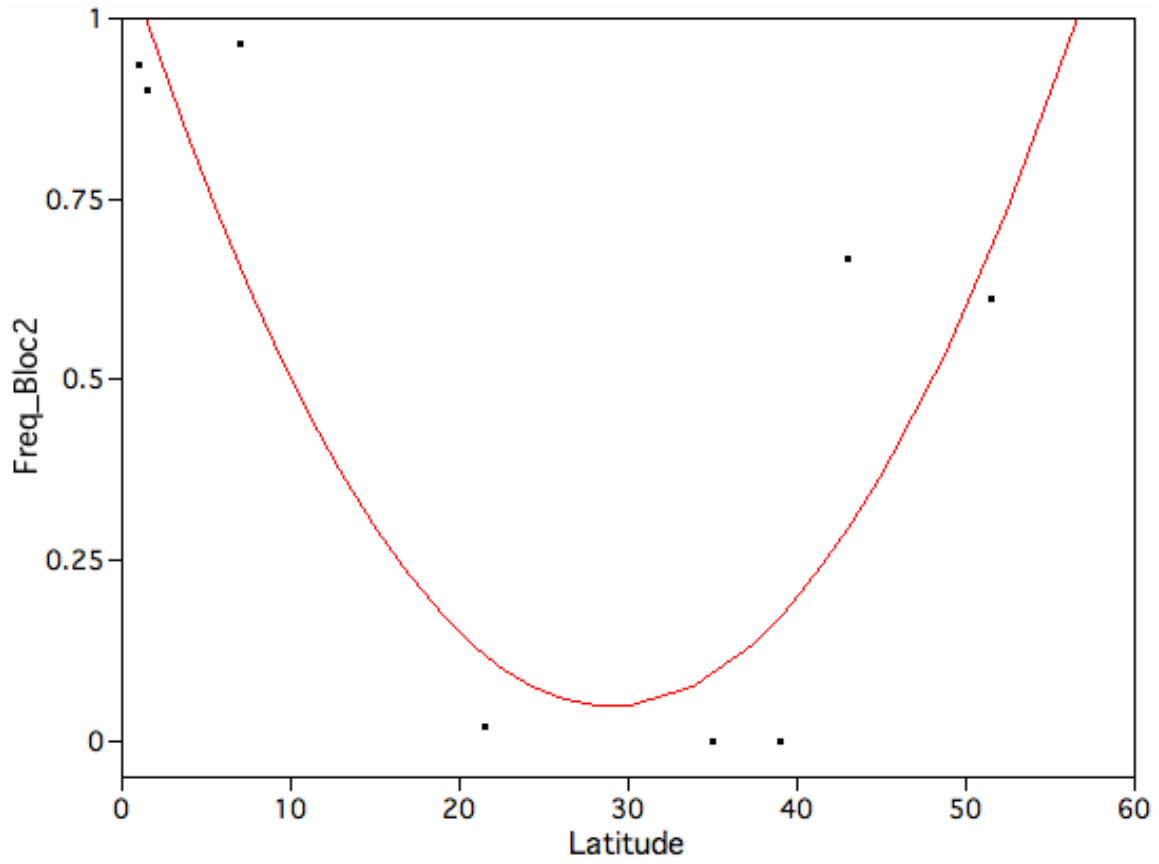

Figure S1. A plot of the points and least-squares regression (red line) of the frequency of the genome wide Bloc2 from the HapMap data versus latitude.
