# Supplementary material for: Latitudinal Clines of the Human Vitamin D Receptor and Skin Color Genes
Source: PubMed Central journal article supplement (PMC4856077; doi:10.1534/g3.115.026773), 2016-02-26
Supplement: supp_g3.115.026773_TableS1.pdf [file supp_g3.115.026773_TableS1.pdf]

Table S1. SNPs performed using TaqMan assays on OpenArray platform (Applied Biosystems). SNP positions are indicated according to Genome Build 37.1

| Gene             | TaqMan assay name | Number dbSNP | Nucleotides | Position   | Gene Location |
|------------------|-------------------|--------------|-------------|------------|---------------|
| <b>TYR-1</b>     | C__8362862_10     | rs1042602    | C / A       | 88,911,696 | Ser192Tyr     |
|                  |                   |              |             |            |               |
| <b>TYRP1-1</b>   | C__1911864_20     | rs1408799    | T / C       | 12,672,097 | 5'UTR         |
| <b>TYRP1-2</b>   | C__3119210_10     | rs2733832    | C / T       | 12,704,725 | Intron 5      |
|                  |                   |              |             |            |               |
| <b>OCA2-1</b>    | C__8866200_10     | rs1800407    | G / A       | 28,230,318 | Arg419Gln     |
| <b>OCA2-2</b>    | C__8866240_10     | rs1800414    | A / G       | 28,197,037 | His615Arg     |
|                  |                   |              |             |            |               |
| <b>SLC45A2-1</b> | C__2390575_1_     | rs26722      | G / A       | 33,963,870 | Glu272Lys     |
| <b>SLC45A2-2</b> | C__2842665_10     | rs16891982   | C / G       | 33,951,693 | Phe374Leu     |
|                  |                   |              |             |            |               |
| <b>SLC24A5</b>   | C__2908190_10     | rs1426654    | A / G       | 48,426,484 | Thr111Ala     |
|                  |                   |              |             |            |               |
| <b>KITLG</b>     | C__26988870_10    | rs12821256   | T / C       | 89,328,335 | 5'UTR         |
|                  |                   |              |             |            |               |
| <b>MC1R-1</b>    | C__27982534_20    | rs3212357    | T / C       | 89,984,604 | 5'UTR         |
| <b>MC1R-2</b>    | C__60403717_10    | rs34057592   | C / T       | 89,985,051 | 5'UTR         |
| <b>MC1R-3</b>    | C__32390814_10    | rs3212379    | C / T       | 89,985,131 | 5'UTR         |
| <b>MC1R-4</b>    | C__2033408_20     | rs3212359    | C / T       | 89,985,177 | 5'UTR         |
| <b>MC1R-5</b>    | C__27841133_10    | rs76337330   | A / G       | 89,985,311 | 5'UTR         |
| <b>MC1R-6</b>    | C__2033406_1_     | rs3212363    | A / T       | 89,985,441 | 5'UTR         |

|                |               |              |       |            |                 |
|----------------|---------------|--------------|-------|------------|-----------------|
| <b>MC1R-7</b>  | C__7519054_10 | rs1805005    | G / T | 89,985,844 | Val60Leu        |
| <b>MC1R-8</b>  | C_60403720_10 | rs34090186   | G / A | 89,985,866 | Arg67Gln        |
| <b>MC1R-9</b>  | C__7519055_20 | rs1805006    | C / A | 89,985,918 | Asp84Glu        |
| <b>MC1R-10</b> | C_60403722_10 | rs34540312   | G / A | 89,985,931 | Gly89Arg        |
| <b>MC1R-11</b> | C__2033405_20 | rs2228479    | G / A | 89,985,940 | Val92Met        |
| <b>MC1R-12</b> | C_60403725_10 | rs33932559   | T / C | 89,986,025 | Ile120Thr       |
| <b>MC1R-13</b> | C_27541634_10 | rs11547464   | G / A | 89,986,09  | Arg142His       |
| <b>MC1R-14</b> | C__2033404_30 | rs1805007    | C / T | 89,986,117 | Arg151Cys       |
| <b>MC1R-16</b> | C__7519060_20 | rs885479     | G / A | 89,986,154 | Arg163Glu       |
| <b>MC1R-17</b> | C_25647438_10 | rs34612847   | C / T | 89,986,170 | Ile168Ile       |
| <b>MC1R-18</b> | C_60403730_10 | rs34209185   | C / T | 89,986,215 | Tyr183Tyr       |
| <b>MC1R-19</b> | C_32390806_20 | rs3212366    | T / C | 89,986,252 | Phe196Leu       |
| <b>MC1R-20</b> | C_60403731_20 | rs34564466   | G / A | 89,986,299 | Leu211Leu       |
| <b>MC1R-21</b> | C_25647439_10 | rs34490506   | C / T | 89,986,383 | Gly239Gly       |
| <b>MC1R-22</b> | C_27860175_10 |              | A / C | 89,986,445 | His260Pro       |
| <b>MC1R-23</b> | C_25647446_10 | rs3212367    | C / T | 89,986,566 | Phe300Phe       |
| <b>MC1R-24</b> | C__2033403_10 | rs2228478    | A / G | 89,986,608 | Thr314Thr       |
| <b>MC1R-25</b> | C__2033402_10 | rs3212369    | A / G | 89,986,760 | 3'UTR           |
| <b>MC1R-26</b> | C_25958294_10 | Rs 143513600 | A / G | 89,986,957 | 3'UTR           |
| <b>MC1R-27</b> | C_25960110_10 | rs3212371    | A / G | 89,987,201 | 3'UTR           |
|                |               |              |       |            |                 |
| <b>VDR-1</b>   | C_27909097_10 | rs4237856    | G / T | 48,338,050 | Promoter        |
| <b>VDR-2</b>   | C_27909106_10 | rs4073729    | C / T | 48,337,069 | Promoter        |
| <b>VDR-3</b>   | C__2880808_10 | rs11568820   | G / A | 48,302,545 | Promoter (Cdx2) |

|               |                |            |       |            |                              |
|---------------|----------------|------------|-------|------------|------------------------------|
| <b>VDR-4</b>  | C__27904554_10 | rs4760658  | T / C | 48,296,486 | Promoter (Intron 1a)         |
| <b>VDR-5</b>  | C__2880803_10  | rs10783219 | T / A | 48,295,488 | Promoter (Intron 1a)         |
| <b>VDR-6</b>  | C__44841112_10 | rs11168293 | C / A | 48,293,716 | Promoter (Intron 1a)         |
| <b>VDR-7</b>  | C__12060037_10 | rs10875695 | G / T | 48,293,037 | Promoter (Intron 1a)         |
| <b>VDR-8</b>  | C__12060038_10 | rs7302235  | A / G | 48,292,838 | Promoter (Intron 1a)         |
| <b>VDR-9</b>  | C__15823889_10 | rs2853564  | C / T | 48,278,487 | Promoter (Intron 1a)         |
| <b>VDR-10</b> | C__12060044_1_ | rs1989969  | T / C | 48,278,010 | Promoter (Intron 1a)         |
| <b>VDR-11</b> | C__3290655_1_  | rs2238136  | G / A | 48,277,713 | Promoter (Intron 1a)         |
| <b>VDR-12</b> | C__12060045_20 | rs2228570  | T / C | 48,272,895 | Exon2 (Met1Thr)<br>[FokI]    |
| <b>VDR-13</b> | C__3290647_10  | rs3782905  | C / G | 48,266,167 | Intron 2                     |
| <b>VDR-14</b> | C__3290638_1_  | rs2238138  | C / T | 48,264,493 | Intron 2                     |
| <b>VDR-15</b> | C__30742507_10 | rs11574070 | C / T | 48,257,895 | Intron 3                     |
| <b>VDR-16</b> | C__3290631_1_  | rs2239180  | G / C | 48,256,046 | Intron 3                     |
| <b>VDR-17</b> | C__3290630_1_  | rs2248098  | T / C | 48,253,356 | Intron 3                     |
| <b>VDR-18</b> | C__30742483_10 | rs7305032  | C / T | 48,249,860 | Intron 5                     |
| <b>VDR-19</b> | C__16174104_10 | rs2239183  | G / T | 48,244,660 | Intron 6                     |
| <b>VDR-20</b> | C__30742462_10 | rs12314197 | T / C | 48,242,722 | Intron 6                     |
| <b>VDR-21</b> | C__16031766_10 | rs2525044  | T / C | 48,242,256 | Intron 6                     |
| <b>VDR-22</b> | C__8716062_10  | rs1544410  | G / A | 48,239,835 | Intron 8 [BsmI]              |
| <b>VDR-23</b> | C__30742443_10 | rs11574114 | G / A | 48,238,883 | Intron 8                     |
| <b>VDR-24</b> | C__28977635_10 | rs7975232  | G / T | 48,238,837 | Intron 8 [ApaI]              |
| <b>VDR-25</b> | C__2404008_10  | rs731236   | T / C | 48,238,757 | Exon 9 (Ile352Ile)<br>[TaqI] |
| <b>VDR-26</b> | C__2404007_10  | rs739837   | C / A | 48,238,221 | 3'UTR                        |

|               |                |           |       |            |       |
|---------------|----------------|-----------|-------|------------|-------|
| <b>VDR-27</b> | C__2404006_10  | rs3847987 | G / T | 48,238,068 | 3'UTR |
| <b>VDR-28</b> | C__15823846_10 | rs2853563 | G / A | 48,235,738 | 3'UTR |
|               |                |           |       |            |       |
